# Supplementary material for: West Nile Disease Symptoms and Comorbidities: A Systematic Review and Analysis of Cases
Source: MDPI journal article supplement (doi:10.3390/tropicalmed7090236), 2022-09-08
Supplement: s1 [file s1]

## SUPPLEMENTARY FIGURES

### Search Strategies

Pubmed (1,037 entries):

- #1 (West Nile Virus [MH]) OR (West Nile [ti])
- #2 (case reports [publication type]) OR (case reports[mh]) OR (case[tiab]) OR (diagnos\*[tiab])
- #3 (animals[mh]) NOT (humans[mh])
- #4 (#1 AND #2) NOT #3

EMBASE (via Ovid, 1583 entries)

- #1 exp west nile virus/
- #2 west nile.ti
- #3 #1 or #2
- #4 exp case report/
- #5 case.ti,ab
- #6 diagnos\$.ti,ab
- #7 #4 or #5 or #6
- #8 exp animals/
- #9 exp humans/
- #10 #8 not #9
- #11 (#3 and #7) not #10

**Figure S1.** The search strategy terms as used in the Rayan platform for systemic studies for PubMed and EMBASE databases.

## SUPPLEMENTARY TABLES

Table S1. Raw cases counts and statistical significance of symptoms between deceased and recovered patients' groups. Significance values in bold designates p-values <0.05.

| Symptoms                                             | Deceased patients (n=) |                 | Recovered patients (n=) |                 | Significance level<br>(p-value) |
|------------------------------------------------------|------------------------|-----------------|-------------------------|-----------------|---------------------------------|
|                                                      | with symptom           | without symptom | with symptom            | without symptom |                                 |
| altered mental status /<br>confusion / delirium      | 51.00                  | 46.00           | 136.00                  | 206.00          | = <b>0.00805</b>                |
| dizziness                                            | 3.00                   | 94.00           | 20.00                   | 322.00          | = 0.28348                       |
| memory loss / disorientation                         | 3.00                   | 94.00           | 21.00                   | 321.00          | = 0.24486                       |
| cognitive diff / impaired<br>consciousness / agnosia | 6.00                   | 91.00           | 33.00                   | 309.00          | = 0.29101                       |
| headache                                             | 22.00                  | 75.00           | 132.00                  | 210.00          | = <b>0.00367</b>                |
| photophobia                                          | 1.00                   | 96.00           | 18.00                   | 324.00          | = 0.07088                       |
| speech problems / dysarthria /<br>aphasia            | 15.00                  | 82.00           | 44.00                   | 298.00          | = 0.50891                       |
| hyporeflexia / areflexia /<br>unresponsiveness       | 18.00                  | 79.00           | 46.00                   | 296.00          | = 0.20932                       |
| malaise /<br>numbness / dysesthesia                  | 9.00                   | 88.00           | 21.00                   | 321.00          | = 0.28071                       |
| walking-gait<br>problems / poor balance              | 4.00                   | 93.00           | 40.00                   | 302.00          | = <b>0.02840</b>                |
| seizures / status epilepticus                        | 4.00                   | 93.00           | 11.00                   | 331.00          | = 0.66502                       |
| fever/pyrexia<br>(West Nile fever)                   | 85.00                  | 12.00           | 259.00                  | 83.00           | = <b>0.01195</b>                |
| cough / sore throat                                  | 5.00                   | 92.00           | 12.00                   | 330.00          | = 0.45950                       |
| tremors / chills / rigors /<br>sweats                | 27.00                  | 70.00           | 84.00                   | 258.00          | = 0.51374                       |
| extremity weakness / paralysis<br>/ lesion           | 36.00                  | 61.00           | 121.00                  | 221.00          | = 0.75392                       |
| fatigue / generalized weakness                       | 26.00                  | 71.00           | 102.00                  | 240.00          | = 0.98972                       |
| muscle weakness - stiffness                          | 9.00                   | 88.00           | 45.00                   | 297.00          | = 0.30561                       |
| myoclonus                                            | 4.00                   | 93.00           | 20.00                   | 322.00          | = 0.51079                       |
| ataxia / dysmatia                                    | 1.00                   | 96.00           | 12.00                   | 330.00          | = 0.20473                       |
| neck pain / stiffness                                | 9.00                   | 88.00           | 51.00                   | 291.00          | = 0.15464                       |
| abdominal pain                                       | 5.00                   | 92.00           | 22.00                   | 320.00          | = 0.64466                       |
| myalgia                                              | 12.00                  | 85.00           | 43.00                   | 299.00          | = 0.95782                       |
| arthralgia                                           | 5.00                   | 92.00           | 10.00                   | 332.00          | = 0.28684                       |
| rash                                                 | 5.00                   | 92.00           | 50.00                   | 292.00          | = <b>0.01287</b>                |
| nausea / vomiting / emesis                           | 33.00                  | 64.00           | 97.00                   | 245.00          | = 0.28239                       |
| anorexia /<br>weight loss                            | 11.00                  | 86.00           | 13.00                   | 329.00          | = <b>0.00387</b>                |
| diarrhea                                             | 16.00                  | 81.00           | 45.00                   | 297.00          | = 0.40283                       |
| respiratory problem                                  | 10.00                  | 87.00           | 35.00                   | 307.00          | = 0.98282                       |
| kidney/urine problem                                 | 7.00                   | 90.00           | 9.00                    | 333.00          | = <b>0.03348</b>                |
| agitation / palpitation /<br>tachycardia             | 3.00                   | 94.00           | 8.00                    | 334.00          | = 0.67596                       |
| somnolence / lethargy /<br>sleepiness / drowsiness   | 15.00                  | 82.00           | 51.00                   | 291.00          | = 0.89357                       |
| coma                                                 | 1.00                   | 96.00           | 5.00                    | 337.00          | = 0.74758                       |

Table S2. Raw cases counts and statistical significance of measurements between deceased and recovered patients' groups. Significance values in bold designates p-values <0.05.

| CSF & Blood tests                       | Deceased patients (n=) |                      | Recovered patients (n=) |                      | Significance level (p-value) |
|-----------------------------------------|------------------------|----------------------|-------------------------|----------------------|------------------------------|
|                                         | with abnormal readings | with normal readings | with abnormal readings  | with normal readings |                              |
| protein (normal 20-45 mg/dL)            | 53                     | 6                    | 173                     | 8                    | = 0.13622                    |
| glucose (normal 45–80 mg/dL)            | 14                     | 16                   | 20                      | 79                   | = <b>0.00030</b>             |
| White blood cells/ $\mu$ L (normal 0-5) | 55                     | 7                    | 183                     | 14                   | = 0.14899                    |
| Red blood cells/ $\mu$ L (normal 0-5)   | 13                     | 3                    | 38                      | 19                   | = 0.91892                    |
| White blood cells/ $\mu$ L (4000-10800) | 4                      | 7                    | 11                      | 16                   | = 0.39490                    |

Table S3. Raw cases counts and statistical significance of comorbidities between deceased and recovered patients' groups. Significance values in bold designates p-values <0.05.

| Comorbidities                 | Deceased patients (n=) |                     | Recovered patients (n=) |                     | Significance level (p-value) |
|-------------------------------|------------------------|---------------------|-------------------------|---------------------|------------------------------|
|                               | with comorbidity       | without comorbidity | with comorbidity        | without comorbidity |                              |
| WNV past infection            | 0.00                   | 97.00               | 6.00                    | 336.00              | = 0.18984                    |
| hepatitis C                   | 1.00                   | 96.00               | 7.00                    | 335.00              | = 0.51022                    |
| herpes simplex virus          | 0.00                   | 97.00               | 1.00                    | 341.00              | = 0.59491                    |
| bacterial infection           | 2.00                   | 95.00               | 8.00                    | 334.00              | = 0.87200                    |
| (auto)immune disorder         | 6.00                   | 91.00               | 14.00                   | 328.00              | = 0.38430                    |
| cancer                        | 27.00                  | 70.00               | 41.00                   | 301.00              | < <b>0.0001</b>              |
| transplant / transfusion      | 33.00                  | 64.00               | 43.00                   | 299.00              | < <b>0.0001</b>              |
| diabetes                      | 19.00                  | 78.00               | 44.00                   | 298.00              | = 0.09598                    |
| cardiovascular problems       | 15.00                  | 82.00               | 41.00                   | 301.00              | = 0.36626                    |
| hyperlipidemia                | 4.00                   | 93.00               | 9.00                    | 333.00              | = 0.44531                    |
| hypertension                  | 19.00                  | 78.00               | 51.00                   | 291.00              | = 0.26796                    |
| stroke                        | 1.00                   | 96.00               | 2.00                    | 340.00              | = 0.63874                    |
| pulmonary infection / disease | 5.00                   | 92.00               | 5.00                    | 337.00              | = <b>0.03147</b>             |
| kidney / renal problem        | 7.00                   | 90.00               | 20.00                   | 322.00              | = 0.62142                    |
| spinal problems               | 1.00                   | 96.00               | 4.00                    | 338.00              | = 0.90981                    |
| neurological problem          | 0.00                   | 97.00               | 334.00                  | 342.00              | = 0.12904                    |
| smoking                       | 1.00                   | 96.00               | 4.00                    | 338.00              | = 0.90981                    |

Table S4. Raw cases counts and statistical significance of administered therapy agents between deceased and recovered patients' groups. Significance values in bold designates p-values <0.05.

| Administered therapy                | Deceased patients (n=) | Recovered patients (n=) | Significance level (p-value) |
|-------------------------------------|------------------------|-------------------------|------------------------------|
| antibiotics                         | 16                     | 32                      | = 0.58845                    |
| intravenous immunoglobulin          | 8                      | 23                      | = 0.48353                    |
| corticosteroids                     | 10                     | 15                      | = 0.24911                    |
| anticoagulants                      | 0                      | 3                       | = 0.24624                    |
| antihypertensive drugs              | 11                     | 16                      | = 0.18962                    |
| immunosuppressants                  | 8                      | 8                       | = 0.06912                    |
| mechanical ventilation - intubation | 5                      | 3                       | = <b>0.04252</b>             |
| antiseizure drugs                   | 1                      | 3                       | = 0.80351                    |
| interferon                          | 0                      | 2                       | = 0.34678                    |
| plasmapheresis                      | 3                      | 1                       | = 0.05059                    |

Table S5. Gender counts in deceased and recovered patients' groups. Sex ratio and mean age is reported

|                  | Sex    |      | Sex Ratio<br>(Female/Male) | Age   |
|------------------|--------|------|----------------------------|-------|
|                  | Female | Male |                            |       |
| <b>Deceased</b>  | 37     | 63   | 0.59                       | 54.54 |
| <b>Recovered</b> | 121    | 216  | 0.56                       | 60.59 |

Table S6. Geographical origin of cases in deceased and recovered patients' groups.

|                  | North<br>America | South<br>America | Europe | Africa | Asia | Australia | N/A |
|------------------|------------------|------------------|--------|--------|------|-----------|-----|
|                  |                  |                  |        |        |      |           |     |
| <b>Deceased</b>  | 61               | 0                | 6      | 0      | 4    | 0         | 30  |
| <b>Recovered</b> | 205              | 1                | 42     | 3      | 15   | 4         | 66  |
